# **Title: In-depth 15 H7N9 Human Serum Proteomics Profiling Study**

ZiFeng Yang<sup>1#</sup>, Wenda Guan<sup>1#</sup>, Shiyi Zhou<sup>2#</sup>, Liping Chen<sup>1#</sup>, Chris K.P. Mok<sup>1</sup>, Jicheng Huang<sup>3</sup>, Shiguan Wu<sup>1</sup>, Hongxia Zhou<sup>1</sup>, Yong Liu<sup>1,2</sup>, Malik Peiris<sup>1,4</sup>, Xiaoqing Liu<sup>1\*</sup>, Yimin Li<sup>1\*</sup>, Nanshan Zhong<sup>1</sup>

1. State Key Laboratory of Respiratory Disease (Guangzhou Medical University), National Clinical Research Center for Respiratory Disease, First Affiliated Hospital of Guangzhou Medical University, Guangzhou, 510120, PR China

2. State Key Laboratory of Respiratory Disease-Research Laboratory for Clinical Virology, National Clinical Research Center of Respiratory Disease-Research Center for Clinical Virology, Kingmed Virology Diagnostic & Translational Center, Guangzhou Kingmed Center for Clinical Laboratory Co., Ltd.

3. Technology Centre, Guangzhou customs district, PR China

4. HKU-Pasteur Research Pole, School of Public Health, HKU Li Ka Shing Faculty of Medicine, The University of Hong Kong, Hong Kong Special Administrative Region, PR China

Zifeng Yang:

E-mail: jeffyah@163.com

Wenda Guan:

E-mail: guanwenda2004@163.com

Shiyi Zhou:

E-mail: zhoushiyi25@hotmail.com

Liping Chen:

E-mail: chenlipingchan@163.com

Chris K.P. Mok:

E-mail: ch02mkp@hku.hk

Jicheng Huang:

E-mail: jichenghuang@126.com

27 Shiguan Wu:

28 E-mail: 13760764646@163.com

29 Hongxia Zhou:

30 E-mail: zhouhongxia00307@163.com

31 Yong Liu:

32 E-mail: lably@kingmed.com.cn

33 Malik Peiris:

34 E-mail: malik@hku.hk

35 Nanshan Zhong:

36 E-mail: nanshan@vip.163.com

37 \* **Corresponding author:**

38 Xiaoqing Liu:

39 E-mail: lxq1118@126.com

40 Full postal address: No.195, Dongfengxi Road, Guangzhou, China

41 Yimin Li:

42 E-mail: dryiminli@vip.163.com

43 Full postal address: No.195, Dongfengxi Road, Guangzhou, China

44 #: These authors are co-first authors who contributed equally in this manuscript

45 **Abstract word count:** 183

46 **Text word count:** 2981

47

## 48 **Abstract**

49 **Background.** Human infection by avian influenza viruses is characterized by rapid development of  
50 acute respiratory distress and severe pneumonia. However, the underlying host response leading to  
51 this severe outcome is not well studied.

52 **Methods.** We conducted mass spectrometry-based serum proteome profiling on 10 healthy controls  
53 and 15 H7N9 infected cases with two time points and carried out statistical and biology functional  
54 enrichment analysis.

55 **Results.** In total, we identified 647 proteins, 273 proteins were only found in H7N9 infected cases  
56 which might generate from cell leakage/death (apoptosis and/or necrosis) and identified 50 proteins  
57 with statistically significant difference between healthy control and H7N9 infected cases from 168  
58 qualified proteins. We also found that M1 and PB2 tightly associated with the host's HSPA8 (P11142,  
59  $p=0.0042$ ) which plays an important role in the protein quality control system.

60 **Conclusions.** H7N9 infection may increase cell programmed/unprogrammed cell death, and we  
61 suggested that upregulated extracellular HSPA8 may suppress the H7N9 virion replication via  
62 activation amyloid-beta binding network.

63 **Keywords.** H7N9; avian influenza; cell death; HSPA8; proteomic.

## 64 **Introduction**

65 As of August 2019, there have been 1568 confirmed human cases and 616 deaths caused by infection  
66 with avian H7N9 influenza A viruses in China, with a 39% mortality rate [1]. In April 2019 a fatal  
67 case of highly pathogenic avian influenza (HPAI) H7N9 was reported in Inner Mongolia, China,  
68 which was associated with severe pneumonia and respiratory failure [2]. Acute respiratory distress  
69 syndrome, as observed in the recent human case of HPAI H7N9 infection, may be caused by multiple  
70 factors, including higher viral load [3], altered viral tropism and spread in the lower/upper respiratory  
71 tract [4], virally-induced host shutoff [5] or hijacking host function [6–9]. Mass spectrometry-based  
72 serum proteome profiling has made it possible to conduct extracellular fluid proteins analysis and to

investigate important mediators of intercellular communication and host-viral interactions associated with disease progression, coagulation, communication, inflammation and the immune response. Several studies have been published using mass spectrometry-based proteomics with *in-vitro* assays (Supplementary Table 1)[10–12]. Simon et al. (2015) performed a comparative proteomic study in A549 human cells infected with seasonal H1N1 (sH1N1), pdmH1N1, H7N9 and HPAI H5N1 strains. Using multiplex iTRAQ labelled quantification, they found that NRF2 was associated with infection with HPAI strains of influenza[10]. Ding et al.(2016) carried out similar research work in A549 infected with pdmH1N1 and H7N9 by labelling digested proteins with Cy-dye followed by identification using MALDI-TOF-MS/MS, and found that down-regulation of CAPZA1, OAT, PCBP1, EIF5A were related to the death of cells infected with H7N9, and down-regulation of PAFAH1B2 was related to the later clinical symptoms in patients infected with H7N9[11]. Sadewasser et al.(2017) performed SILAC labelled proteomic assays on human HEK 293T and A549, characterized sets of cellular factors alternatively regulated in cells infected with H3 or H7 AIVs, and suggested that VPRBP(*DCAF1*) was identified as a novel drug target [12]. There has also been a study conducted in humans by Wang et al. (2018), who revealed the differential plasma proteome profiles in two cases of H7N9 infection in a single family[13]. Apolipoproteins appeared to play a critical role in the progression of H7N9 infection and disease. To our knowledge few population-based extracellular fluid proteomic studies on host-viral interactions underlying subtype H7N9 influenza virus infection have been published.

To better understand host's response to H7N9 infection, we carried out serum proteomics profiling on 15 confirmed H7N9 human cases at two time points and compared these with 10 healthy controls. These experiments were performed on LC/MS/MS using labelling by iTRAQ method. We also built a local cloud-based analysis workflow for stable isotopic labelled proteomics study to qualify and quantify proteins and conduct comparative analysis. Our study identified key host responses that may be related to the progression of H7N9 disease.

## Materials and Methods

15 patients with laboratory-confirmed, 14 patients in low pathogenic avian influenza A H7N9 infected (LPAI) and one in high pathogenic avian influenza A H7N9 infected (HPAI), were enrolled at First Affiliated Hospital of Guangzhou Medical University, from 2013 to 2017. The clinical history were recorded. The detailed enrollment process has been shown in Figure 1.

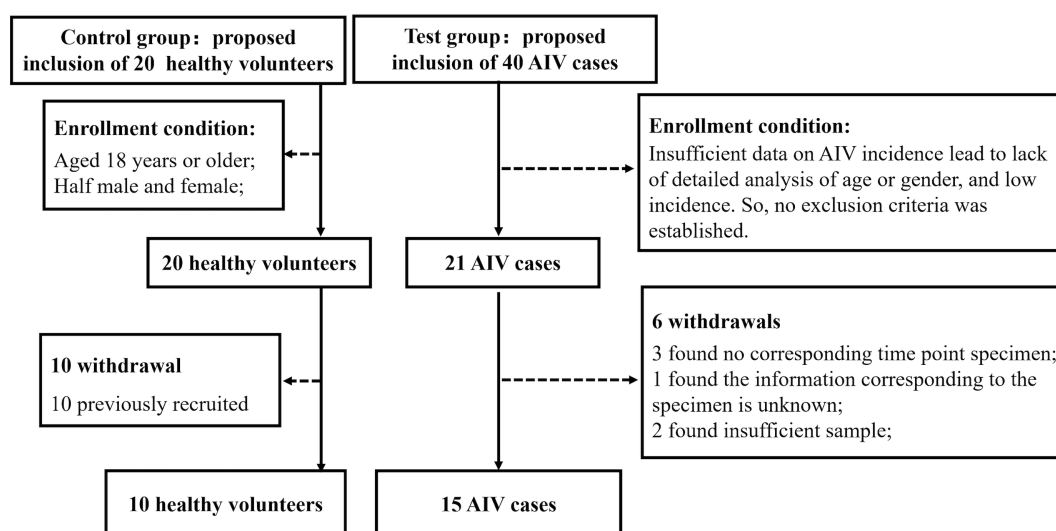

Figure 1: We totally assessed 20 healthy volunteers and 21 H7N9 infected patients, 10 healthy control and 6 H7N9 infected patients withdrawn due to the protocol violations. Finally, 15 patients and 10 healthy volunteers were enrolled in this study.

Earlier time point was defined as the earlier one of the two time points, and Later time point was the later one. The metadata of the patients were tabulated in Supplementary Table 2; and clinical and immunological features of some patients have been reported[3,14]. Ten healthy serum controls were collected from our lab colleagues. Approval for the study was obtained from the ethics committee of the First Affiliated Hospital of Guangzhou Medical University (No.:2016-78) and informed consent was obtained from the patients or their family members.

Proteome profiling of host serum was performed by iTRAQ-based quantitative differential LC/MS/MS, protein identification and quantitation were carried out by in-house workflow deployed in Galaxy framework[15], statistical related analysis was done using MetaboAnalystR (v2.0)[16] in R (v3.6.1), and biological and functional analysis were analyzed by STRING tools[17]. Detailed workflow was provided as supplementary text 1 and showed in Figure 2, we also provided Galaxy workflow for this study as Supplementary workflow 1.

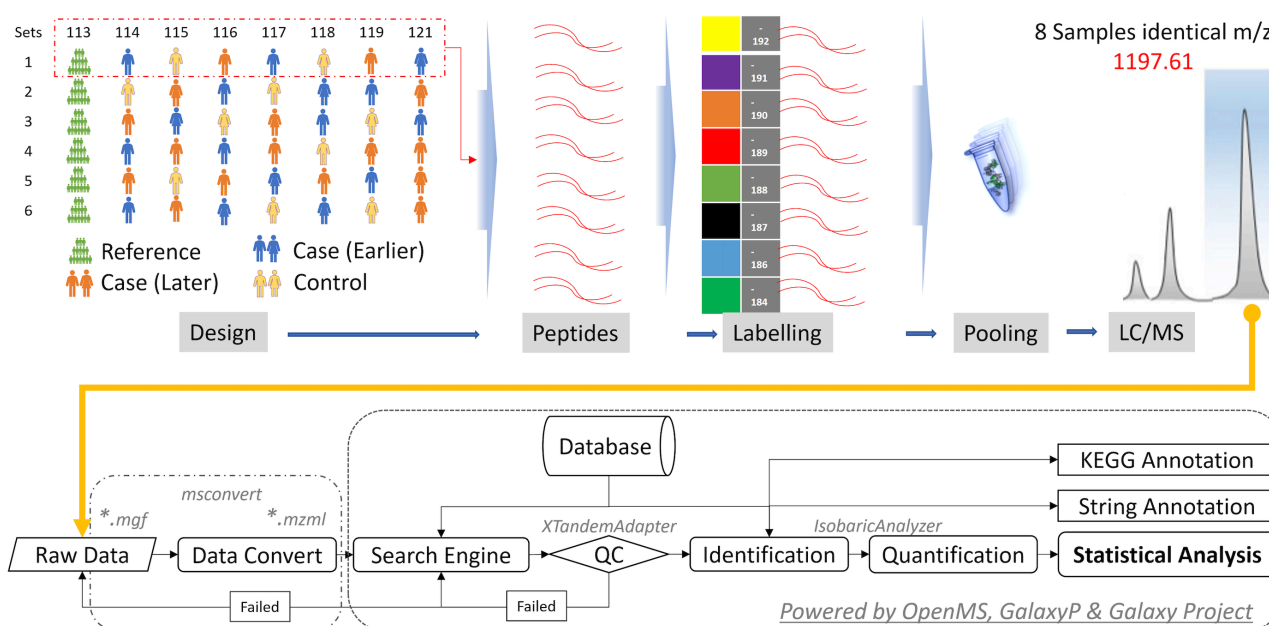

Figure 2. Experimental and analytical scheme of deep depleted serum proteome analysis using

iTRAQ LC/MS. H7N9 infected cases and control samples were extracted, depleted high-abundance protein, digested, labeled and pooled, coupled with high-resolution MALDI-TOF/TOF MS (Bruker Daltonics, Billerica, MA). All data were analyzed by the in-house workflow, which was powered by OpenMS, GalaxyP and Galaxy Project.

## Results

### Clinical Characteristics Of the Samples

Fifteen H7N9 infected patients were enrolled in this study from 2013 to 2017. Clinical, virologic, and immunological features of each patient were recorded in detail (Supplementary Table 2), including 14 LPAI and one HPAI patients. Five patients (No. 3, 9, 11, 12, and 14) had a fatal outcome, and the remaining patients were discharged. All samples had laboratory confirmed with H7N9 infection by RT-PCR using specific HA primers. The mean age was ( $28.60 \pm 2.79$ y) in the control group compared to the case group ( $49.50 \pm 17.83$ y) with statistical significantly difference. The viral load was determined from the throat swab (termed as an upper respiratory tract specimen) and from BALF or endotracheal aspirate (termed as lower respiratory tract). The mean URT and LRT viral loads level was  $2.40 \pm 2.14$  (Log10),  $4.35 \pm 1.62$  (Log10) in case's earlier compared to the viral loads  $0, 1.04 \pm 1.94$  (Log10) in later time point with statistical significantly decreased ( $p < 0.05$ ), respectively. We

assumed the viral loads in the upper and lower respiratory tracts were zero and the PF ratio ( $\text{PaO}_2/\text{FiO}_2$ ) values were 450. The mean PF ratio was significantly lower in H7N9 infected cases, and the PF mean value was significantly upregulated after treatment. Table 1 was listed the characteristics of the 25 participants enrolled in this study, including the 10 healthy controls.

# **Overview of H7N9 Infected and Healthy Control Sera Proteomics Profiling**

Based on 130,325 qualified and quantified MS/MS spectra ( $\text{FDR} < 0.01$ ) in all samples, 36,708 non-redundant peptide hits were identified. Identification rates were approximately 28.17% and a total of 647 proteins had been annotated. The detailed information regarding the peptide and protein identification and quantification of six sets generated by X! Tandem and IsobaricAnalyzer are available in Supplementary Table 3. Data are available via ProteomeXchange with identifier IPX0001849000.

# **Differential Expression Profiles of Comparison H7N9 Infected with Healthy Control**

We filtered the raw dataset (Supplementary Table 4), and identified 273 features which were only found in H7N9 infected cases (Supplementary Table 5). Those 273 features which were only found in H7N9 infected cases were applied proteins interaction analysis by String. The results showed 222 nodes with 798 edges, 7.2 average node degree and 0.426 Avg.Local clustering coefficient with protein-protein interaction (PPI) enrichment with  $p$ -value less than  $1.0\text{e-}16$  (Supplementary Table 6). 206 of 273 proteins were annotated to cell part (GO:0044464) from GO Component analysis, and 94 of 273 proteins were from extracellular region (GO:0005576). We then performed Venn diagram analysis on above two proteins list, and found 85 common proteins that can function on both cellular position of cell part (GO:0044464) and extracellular region (GO:0005576). The most of 94 proteins were annotated to immune related pathways by the Reactome database. The top 3 pathways were immune system (HSA-168256, 43 (45.7%)), innate immune system (HSA-168249, 37 (39.4%)) and neutrophil degranulation (HSA-6798695, 31 (32.98%)). The fourth and fifth pathways were metabolism of proteins (HSA-392499, 26 (27.7%)) and post-translational protein modification (HSA-597592, 20 (21.3%)), respectively. However, those 94 proteins could not be confirmed the source,

may be generated from cell death or normally secreted from stressed cells. The remaining 7 singleton proteins were TNFSF12-TNFSF13, AC073610.3 (Novel Protein), C1RL, FBLN2, OLFML3, SBSN and C4orf54. They may play an important role in avian influenza infection, for instance, protein AC073610.3 acts as GTP binding and obsolete signal transducer activity, the most related GGA2 protein associated with avian influenza antibody titers[18]. There were still 51 proteins that were not annotated by the String system. Since our study focused on the extracellular biomarkers, we did not do further analysis on those proteins which were only found with H7N9 infected patients.

The dataset would be further filtered according to the proportion of the missing value (cut-off: 90%) and got the final qualified dataset for statistical analysis (Supplementary Table 7). We got 168 qualified features, and 140 (82.8%) proteins were annotated to the extracellular region (GO:0005576) from GO Component analysis. The qualified dataset was normalized and then applied one-way ANOVA with *post-hoc* tests, we identified 50 features and 4 clinical characters (LRT, URT, PF and TWC) with statistically significant difference (FDR < 0.05; Supplementary Table 8), and HPX (Hemopexin, P02790) was significantly different from each other (FDR = 0.0014, Earlier >> Control, Later >> Control and Earlier >> Later). We performed PPI analysis on those 50 statistically significantly different proteins with all avian influenza A virus proteins, interaction analysis shown 50 nodes, 231 edges, 9.24 average node degree and 0.513 Avg.Local clustering coefficient with PPI's enrichment *p*-value less than 1.0e-16 (Figure 3), found that M1 and PB2 tightly linked with host's HSPA8 (P11142, *p* = 0.0042) which plays a core role in the protein quality control system, ensuring the correct folding of proteins, and downregulated in H7N9 infected cases.





Correlation analysis can be carried out either against features or against a given pattern. The same qualified dataset (Supplementary Table 7) was applied correlation and pattern analysis with the Pearson method ( $FDR < 0.05$ ,  $|r| > 0.5$ ). The correlation of features with the values of different clinical characters, including PF ratio ( $PaO_2/FiO_2$ ), procalcitonin (PCT), viral loads in the lower (LRT) and upper respiratory tract (URT), leucocyte (TWC), c-reactive protein (CRP), oxygen saturation ( $SPO_2$ ) and age, were performed by Pearson correlation test (Supplementary Table 10, 11 and [Table 2](#)). The total leucocyte (TWC) significantly negatively correlated with APOF (Q13790,  $r = -0.54$ ), APOA1 (P02647,  $r = -0.54$ ) and C1QC (P02747,  $r = -0.53$ ), and positively correlated with KRT1 (P04264,  $r = 0.50$ ). Oxygen saturation ( $SPO_2$ ) level has been well confirmed that is associated with lung pathology in influenza infection.  $SPO_2$  level negatively correlated with C4BPA (P04003,  $r = -0.53$ ), F13A1 (P00488,  $r = -0.51$ ), A2M (P01023,  $r = -0.55$ ), PCSK9 (Q8NBP7,  $r = -0.51$ ), PLTP (P55058,  $r = -0.52$ ), APOF (Q13790,  $r = -0.56$ ), APOA1 (P02647,  $r = -0.58$ ) and C1QC (P02747,  $r = -0.59$ ), positively correlated with VTN (P04004,  $r = 0.52$ ), APCS (P02743,  $r = 0.52$ ) and LTF (P02788,  $r = 0.50$ ). To investigate those features correlated with oxygen saturation level, we performed biology functional analysis on those proteins, and found they were highly linked together, and most of them were related with regulation of acute inflammatory response (GO:00002673), regulation of response to external stimulus (GO:0050727) and regulation of defence response (GO:0031347). The PF ratio significantly correlated with CKM (P06732,  $r = 0.50$ ), MBL2 (P11226,  $r = 0.50$ ), CA1 (P00915,  $r = 0.50$ ), CDH5 (P33151,  $r = 0.50$ ), APOE (P02649,  $r = 0.52$ ), CLU (P10909,  $r = 0.54$ ), ITIH2 (P19823,  $r = 0.52$ ) and PLG (P00747,  $r = 0.51$ ). We also performed biology functional analysis on those features and found that those proteins enriched into regulation of response to external stimulus (GO:0032101) and positive regulation of amyloid fibril formation (GO:1905908). Accumulation of beta-amyloid is a clinical sign of Alzheimer's disorder, and Mitchell R. reported beta-amyloid inhibits replication of seasonal and pandemic flu[20].

Aim to identify whether the proteins or clinical characters correlated with H7N9 infection. Pattern analysis was performed on the same dataset (Supplementary Table 7), and termed "1-2-3" as the

226 pattern used to search for interesting features that linearly increase with three groups: (Control-  
227 Earlier-Later). We identified 112 proteins and 2 clinical characters (URT and PaO<sub>2</sub>/FiO<sub>2</sub> ratio)  
228 correlated with healthy control status ( $r < 0$ ), and the rest proteins and clinical characters linked to  
229 H7N9 infectious status ( $r > 0$ ) (Supplementary Table 12). Sixteen proteins and 1 clinical character  
230 (TWC) significantly upregulated in H7N9 infection ( $r > 0.39$ , FDR  $< 0.05$ ), and PPI's enrichment  
231 analysis showed two separately bins, one bin includes KRT family, KRT1, KRT2 and KRT9, the rest  
232 proteins clustered to the 2<sup>nd</sup> bin. Thirteen of 16 proteins annotated to metabolic process (GO:0008152)  
233 by Biological Process database, and 5 of 16 proteins enriched into regulation of protein activation  
234 cascade (GO:2000257). FGA (P02671, Fibrinogen alpha chain), significantly positively correlated  
235 with H7N9 infectious status ( $r = 0.53$ ,  $p = 0.0068$ ). Fibrinogen was upregulated in a non-specific way  
236 in acute inflammatory conditions (infections, rheumatoid arthritis and other inflammations, cancers,  
237 etc.). There were 33 proteins significantly downregulated in H7N9 infection status ( $r < -0.39$ , FDR  $<$   
238 0.05), and biological function analysis showed those proteins enriched into regulation of proteolysis  
239 (GO:0030162), protein processing (GO:0070613) and inflammatory response (GO:0050727).

## 240 Discussion

241 Clinical laboratory examinations are important for assessing the condition of H7N9 infected patients,  
242 however, it is not enough to reveal the etiologic factors that contribute to clinical phenotypes. We  
243 tested several clinical factors, including the viral load on upper/lower respiratory tract, the total white  
244 cell counts, c-reactive protein, procalcitonin, oxygen saturation (SPO<sub>2</sub>) and PaO<sub>2</sub>/FiO<sub>2</sub> ratio, which  
245 have been correlated with influenza virus infection[3,21]. Influenza virus infection may cause host  
246 cells death via several different ways, including apoptosis[22], necroptosis[23] and pyroptosis[24].  
247 H5N1 causes mammalian airway epithelial cells death via apoptosis[25]. A study of H7N9 infected  
248 CD14<sup>+</sup> monocytes showed activation of caspases-8, -9 and -3 at 6h post infection, indicating that  
249 apoptosis and necroptosis pathways were simultaneously activated[26]. Our data showed that 42.1%  
250 of features (273) were only detected in H7N9 infected cases, and 75.5% (206/273) were annotated  
251 into cell part (GO:0044464) from GO Component analysis. Among those cell part (GO:0044464)

252 proteins, still have 84 proteins were also expressed in extracellularly (GO:0005576), and biological  
 253 function enrichment results showed most of them were annotated into immune response related  
 254 pathways by Reactome database. These proteins might be generated by cell leakage/death due to  
 255 H7N9 infection. High levels of cell component leakage can aggravate inflammation, and exacerbated  
 256 the host immune responses, causing lung pathogenesis leading to acute respiratory distress syndrome  
 257 (ARDS) with lower PaO<sub>2</sub>/FiO<sub>2</sub> ratio, which correlated with disease severity level (Figure 4). Due to  
 258 the limitations of study design, we could not confirm those proteins source, Therefore, they may have  
 259 been generated from cell death or normally secreted/leaked from stressed cells.

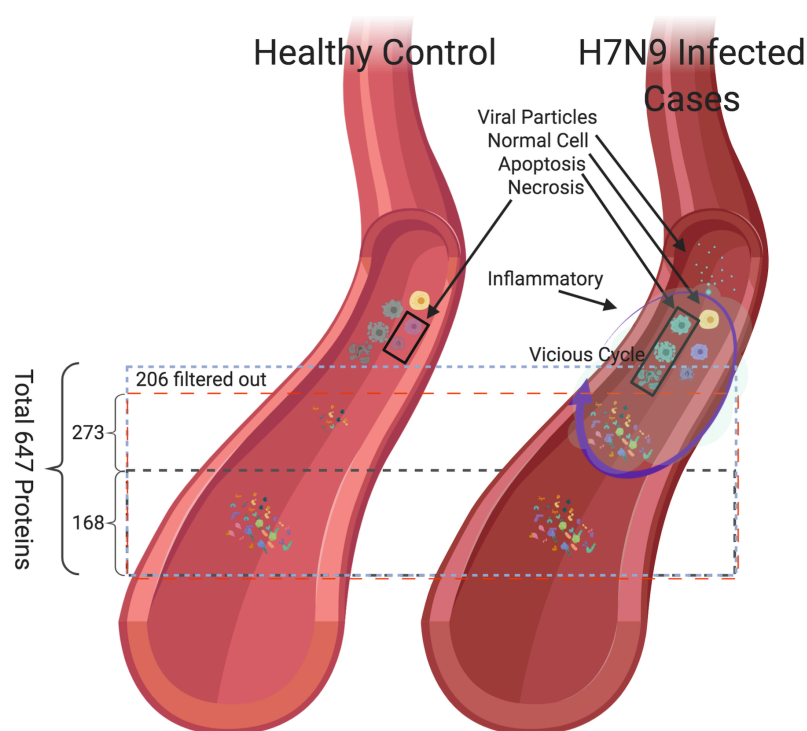

260  
 261 Figure 4. Summary of H7N9 infected and healthy control sera proteomics profiling. In total, we  
 262 identified 647 proteins, and we dropped 206 proteins with more than 50% missing values in order to  
 263 get more reliable results, and also identified 273 proteins were only found in H7N9 infected cases  
 264 which might generate from cell leakage/death (apoptosis and/or necrosis), high levels of cell  
 265 component leakage can aggravate inflammation, and exacerbated host immune responses caused  
 266 lung pathogenesis.

267

268 The Secretory proteins and extracellular vesicles may act via cell-cell communication, delivery  
 269 hormones, enzymes, and antimicrobial peptides. Extracellular fluid proteomic profiling might help  
 270 understanding the host molecular response to influenza and identifying the novel prophylactic and  
 271 therapeutic host biomarkers. In this study, we identified three heat shock proteins, two from the  
 272 HSP70 family (HSPA8, HSPA5) and one from the HSP90 family (HSP90B1). The level of HSPA8  
 273 in serum may vary in certain pathological states. HSPA8 is widely expressed in the plasma membrane,  
 274 extracellularly, in the nucleus and cytosol and the secreted/extracellular HSPA8 has important  
 275 metabolic roles[27], acting as a trigger to boost pro-inflammatory cytokines expression, including  
 276 TNF-alpha, IL-1beta and IL6[28]. HSPA8 may also regulate the hepatitis C virus replication (via  
 277 both positive and negative ways)[29]. Kobayashi's group firstly confirmed that HSPA8 interacts with  
 278 Influenza virus matrix protein 1 (M1)'s C terminal domain, which plays a key role in the virion  
 279 replication, assembly and maturation. The same research group down-regulated HSPA8 with siRNA  
 280 treatment results in reduction of viral load which inhibited the viral M1 and vRNP protein's nuclear  
 281 exportation. They also demonstrated that HSP90 associated with the M1 and PA protein, concluding  
 282 that HSPA8 and HSP90 may play important roles in various steps of the viral replication, assembly  
 283 and maturation[30]. Therefore, Regulating the level of HSPA8 might be a therapeutic host biomarker  
 284 for treatment of influenza infectious disease. Judith Frydman group reported that HSP70 family  
 285 proteins have been shown to be involved into ZIKV virus replication, and HSP70s inhibitors are  
 286 significantly reduced ZIKV replication in human and mosquito cells without appreciable toxicity,  
 287 suggesting that HSP70s inhibitor can be used to treat the emergence of drug-resistant virus[31].  
 288 However, our result showed that HSPA8 was significantly downregulated in H7N9 infected cases ( $r$   
 289 = -0.39, FDR = 0.045), and HSPA8 correlated with APOA1 (P02647,  $r$  = 0.35), APOE (P02649,  $r$  =  
 290 0.26) and CLU (P10909,  $r$  = 0.11), which were annotated into amyloid-beta binding (GO:0001540,  
 291 FDR = 0.0043). Pattern analysis results showed that APOA1, APOE and CLU were negatively  
 292 correlated with H7N9 infection status with  $r$  = -0.38, FDR = 0.051;  $r$  = -0.46, FDR = 0.017 and  $r$  = -  
 293 0.41, FDR = 0.036, respectively. APOE is the major genetic risk factor for Alzheimer's disease



294 (AD)[32], and regulation of beta-Amyloid ( $\beta$ A) metabolism, aggregation and deposition.  
 295 Upregulation of HSP70/HSP90 has also been shown to slow down Alzheimer disease development  
 296 related to  $\beta$ A aggregation[33].  $\beta$ A has been shown to inhibit growth of bacteria and fungi, and the  
 297 replication of seasonal and pandemic strains of H3N2 and H1N1 influenza A virus in vitro[20]. Our  
 298 study suggests that HSPA8, through its role in activating the amyloid-beta binding network, may be  
 299 important in limiting the pathogenesis of H7N9 infection, although this remains to be proven in future  
 300 study (Figure 5). A new compound, SW02, which can specifically upregulated HSP70s has already  
 301 been identified[34,35], which may be an entirely novel way to therapeutic intervention of H7N9  
 302 infection.

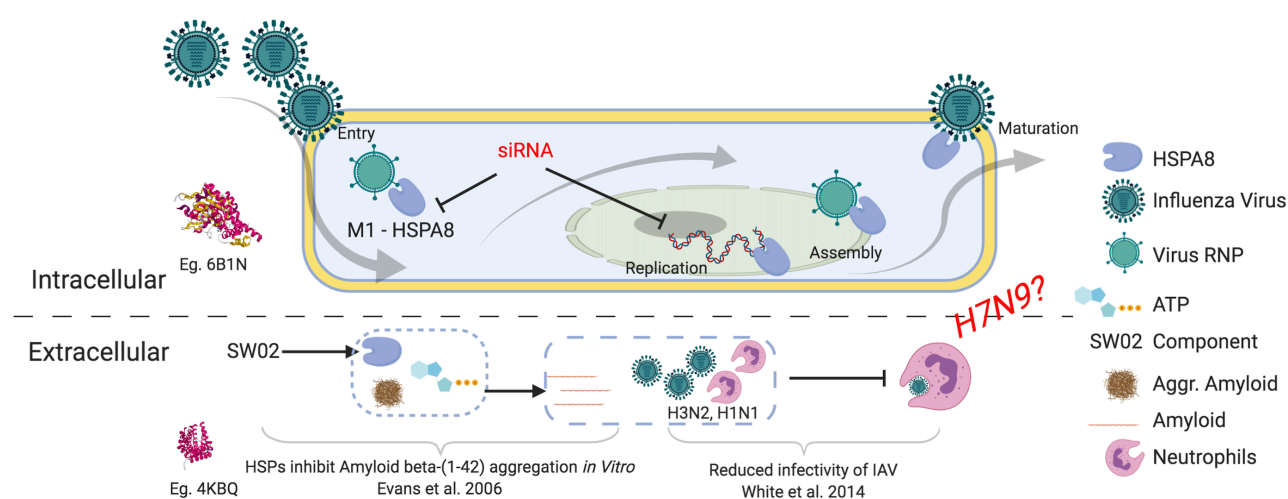

303  
 304 Figure 5. Summary of heat shock protein HSPA8 regulate the influenza A virus replication via both  
 305 positive and negative way. Intracellular: Down-regulated HSPA8 with siRNA treatment results in  
 306 reduction of influenza virus load which inhibited the viral M1 and vRNP proteins nuclear  
 307 exportation. Extracellular: Upregulated HSPA8 with SW02 (HSPA8 activator) may active amyloid-  
 308 beta binding network, then the activated network regulates the beta-amyloid protein which has been  
 309 reported that suppress the H3N2 and H1N1 virion replication, assembly and maturation. Our study  
 310 suggests that it may also work for suppression H7N9.

311 In summary, population-based extracellular fluid proteomic profiling was performed on 15 H7N9  
 312 infected cases compared to 10 healthy controls. We identified features that were distinct only in H7N9  
 313 patients, and most of those features may be from cell leakage/death. We also identified novel

314 candidates that can serve as potential prophylactic and therapeutic host biomarkers. Due to limited  
315 new H7N9 cases (as of October 2017 to now, there were only 4 additional cases[35]), we did not  
316 verify the findings in the same sample sets or apply the verification study on the independent sample  
317 sets. This has limited our study.

318

## 319 **Funding**

320 This study was supported by the National Natural Science Foundation of China [grant number:  
321 81761128014]; the National Key Research and Development Program of China [grant number:  
322 2018YFC1200100]; Guangzhou Medical University High-level University Clinical Research and  
323 Cultivation Program [grant number: Guangzhou Medical University released [2017] No. 160].

## 324 **Acknowledgments**

325 We would like to thank all the clinical staff and research nurses who contributed to this study.  
326 We would like to thank Dr. Sook-San Wong and Dr. Mark Zanin for their suggestions on the article.

## 327 **Potential conflict of interests**

328 All authors reported no conflicts of interest. All authors have submitted the ICMJE Form for  
329 Disclosure of Potential Conflicts of Interest. Conflicts that the editors consider relevant to the content  
330 of the manuscript have been disclosed.

## 331 **\* Corresponding author:**

332 Xiaoqing Liu:

333 E-mail: lxq1118@126.com

334 Full postal address: No.195, Dongfengxi Road, Guangzhou, China

335 Yimin Li:

336 E-mail: dryiminli@vip.163.com

337 Full postal address: No.195, Dongfengxi Road, Guangzhou, China

338 #: These authors are co-first authors who contributed equally in this manuscript

339

340



# Reference

1. Gao R, Cao B, Hu Y, et al. Human infection with a novel avian-origin influenza A (H7N9) virus. *N Engl J Med*. **2013**; 368(20):1888–1897.
2. Yu D, Xiang G, Zhu W, et al. The re-emergence of highly pathogenic avian influenza H7N9 viruses in humans in mainland China, 2019. *Euro Surveill* [Internet]. **2019** [cited 2019 Aug 6]; 24(21). Available from: <https://www.ncbi.nlm.nih.gov/pmc/articles/PMC6540644/>
3. Guan W, Yang Z, Wu NC, et al. Clinical correlations of transcriptional profile in patients infected with avian influenza H7N9 virus. *Journal of Infectious Diseases*. **2018**; 218(8):1238–1248.
4. Chan MCW, Chan RWY, Chan LLY, et al. Tropism and innate host responses of a novel avian influenza A H7N9 virus: an analysis of ex-vivo and in-vitro cultures of the human respiratory tract. *Lancet Respir Med*. **2013**; 1(7):534–542.
5. Bercovich-Kinori A, Tai J, Gelbart IA, et al. A systematic view on influenza induced host shutoff. *Elife*. **2016**; 5.
6. Heaton NS, Cullen BR. Viruses hijack a long non-coding RNA. *Nature*. **2017**; 552(7684):184–185.
7. Kotzin JJ, Mowel WK, Henao-Mejia J. Viruses hijack a host lncRNA to replicate. *Science*. **2017**; 358(6366):993–994.
8. Wang P, Xu J, Wang Y, Cao X. An interferon-independent lncRNA promotes viral replication by modulating cellular metabolism. *Science*. **2017**; 358(6366):1051–1055.
9. Rawlinson SM, Zhao T, Rozario AM, et al. Viral regulation of host cell biology by hijacking of the nucleolar DNA-damage response. *Nat Commun*. **2018**; 9(1):1–13.

- 363 10. Simon PF, McCorrister S, Hu P, et al. Highly pathogenic H5N1 and novel H7N9 influenza A  
364 viruses induce more profound proteomic host responses than seasonal and pandemic H1N1  
365 strains. *Journal of Proteome Research*. **2015**; 14(11):4511–4523.
- 366 11. Ding X, Lu J, Yu R, et al. Preliminary proteomic analysis of A549 cells infected with avian  
367 influenza virus H7N9 and influenza a virus H1N1. *PLoS ONE*. **2016**; 11(5):5–7.
- 368 12. Sadewasser A, Paki K, Eichelbaum K, et al. Quantitative Proteomic Approach Identifies Vpr  
369 Binding Protein as Novel Host Factor Supporting Influenza A Virus Infections in Human  
370 Cells. *Molecular & Cellular Proteomics*. **2017**; .
- 371 13. Zheng Y, Lou X, Yang P, et al. Proteomic analysis of avian influenza A (H7N9) patients  
372 within a family cluster. *Journal of Global Infectious Diseases*. **2018**; 10(2):58.
- 373 14. Yang ZF, Mok CKP, Liu XQ, et al. Clinical, virological and immunological features from  
374 patients infected with re-emergent avian-origin human H7N9 influenza disease of varying  
375 severity in Guangdong province. *Science Translational Medicine*. **2015**; 7(276):1–11.
- 376 15. Afgan E, Baker D, Batut B, et al. The Galaxy platform for accessible, reproducible and  
377 collaborative biomedical analyses: 2018 update. *Nucleic Acids Res*. **2018**; 46(W1):W537–  
378 W544.
- 379 16. Chong J, Yamamoto M, Xia J. MetaboAnalystR 2.0 Workflow: From Raw Spectra to  
380 Biological Insights. :12.
- 381 17. Szklarczyk D, Franceschini A, Wyder S, et al. STRING v10: protein-protein interaction  
382 networks, integrated over the tree of life. *Nucleic Acids Res*. **2015**; 43(Database issue):D447-  
383 452.
- 384 18. Sun Y, Li Q, Hu Y, et al. Genomewide association study of immune traits in chicken F2  
385 resource population. *J Anim Breed Genet*. **2016**; 133(3):197–206.

- 386 19. Murray TC, Jacoby DB. Viral infection increases contractile but not secretory responses to  
387 substance P in ferret trachea. *J Appl Physiol.* **1992**; 72(2):608–611.
- 388 20. White MR, Kandel R, Tripathi S, et al. Alzheimer's Associated  $\beta$ -Amyloid Protein Inhibits  
389 Influenza A Virus and Modulates Viral Interactions with Phagocytes. *PLOS ONE.* **2014**;  
390 9(7):e101364.
- 391 21. Lu S, Li T, Xi X, et al. Prognosis of 18 H7N9 Avian Influenza Patients in Shanghai. *PLOS*  
392 *ONE.* **2014**; 9(4):e88728.
- 393 22. Morris SJ, Nightingale K, Smith H, Sweet C. Influenza A virus-induced apoptosis is a  
394 multifactorial process: exploiting reverse genetics to elucidate the role of influenza A virus  
395 proteins in virus-induced apoptosis. *Virology.* **2005**; 335(2):198–211.
- 396 23. Thapa RJ, Ingram JP, Ragan KB, et al. DAI Senses Influenza A Virus Genomic RNA and  
397 Activates RIPK3-Dependent Cell Death. *Cell Host Microbe.* **2016**; 20(5):674–681.
- 398 24. Ren R, Wu S, Cai J, et al. The H7N9 influenza A virus infection results in lethal inflammation  
399 in the mammalian host via the NLRP3-caspase-1 inflammasome. *Sci Rep.* **2017**; 7(1):7625.
- 400 25. Daidoji T, Koma T, Du A, et al. H5N1 Avian Influenza Virus Induces Apoptotic Cell Death in  
401 Mammalian Airway Epithelial Cells. *Journal of Virology.* **2008**; 82(22):11294–11307.
- 402 26. Lee ACY, Zhang AJX, Chu H, et al. H7N9 influenza A virus activation of necroptosis in  
403 human monocytes links innate and adaptive immune responses. *Cell Death Dis.* **2019**;  
404 10(6):442.
- 405 27. Liu T, Daniels CK, Cao S. Comprehensive review on the HSC70 functions, interactions with  
406 related molecules and involvement in clinical diseases and therapeutic potential. *Pharmacol*  
407 *Ther.* **2012**; 136(3):354–374.

- 408 28. Ao L, Zou N, Cleveland JC, Fullerton DA, Meng X. Myocardial TLR4 is a determinant of  
409 neutrophil infiltration after global myocardial ischemia: mediating KC and MCP-1 expression  
410 induced by extracellular HSC70. *Am J Physiol Heart Circ Physiol*. **2009**; 297(1):H21-28.
- 411 29. Peng Z-G, Fan B, Du N-N, et al. Small molecular compounds that inhibit hepatitis C virus  
412 replication through destabilizing heat shock cognate 70 messenger RNA. *Hepatology*. **2010**;  
413 52(3):845–853.
- 414 30. Watanabe K, Fuse T, Asano I, et al. Identification of Hsc70 as an influenza virus matrix  
415 protein (M1) binding factor involved in the virus life cycle. *FEBS Letters*. **2006**;  
416 580(24):5785–5790.
- 417 31. Taguwa S, Yeh M-T, Rainbolt TK, et al. Zika Virus Dependence on Host Hsp70 Provides a  
418 Protective Strategy against Infection and Disease. *Cell Reports*. **2019**; 26(4):906-920.e3.
- 419 32. Kim J, Basak JM, Holtzman DM. The Role of Apolipoprotein E in Alzheimer’s Disease.  
420 *Neuron*. **2009**; 63(3):287–303.
- 421 33. Evans CG, Wisén S, Gestwicki JE. Heat shock proteins 70 and 90 inhibit early stages of  
422 amyloid beta-(1-42) aggregation in vitro. *J Biol Chem*. **2006**; 281(44):33182–33191.
- 423 34. Jinwal UK, Miyata Y, Iii JK, et al. Chemical Manipulation of Hsp70 ATPase Activity  
424 Regulates Tau Stability. :10.
- 425 35. Bonam SR, Ruff M, Muller S. HSPA8/HSC70 in Immune Disorders: A Molecular Rheostat  
426 that Adjusts Chaperone-Mediated Autophagy Substrates. *Cells [Internet]*. **2019** [cited 2019  
427 Oct 15]; 8(8). Available from: <https://www.ncbi.nlm.nih.gov/pmc/articles/PMC6721745/>
- 428 35. FAO H7N9 situation update - Avian Influenza A(H7N9) virus - FAO Emergency Prevention  
429 System for Animal Health (EMPRES-AH). 2015. Available at:

430 [http://www.fao.org/ag/againfo/programmes/en/empres/H7N9/Situation\\_update.html](http://www.fao.org/ag/againfo/programmes/en/empres/H7N9/Situation_update.html). Accessed  
431 21 November 2019.

432

433

434

435 Table 1: Clinical Characteristic of the groups

|                                | Control      | Case (Earlier) | Case (Later)    |
|--------------------------------|--------------|----------------|-----------------|
| Size (n)                       | 10           | 15             |                 |
| Gender <sup>*</sup> (Male)     | 40%          | 53.3%          |                 |
| Age (Year) <sup>†</sup>        | 28.60 ± 2.79 | 49.50 ± 17.83  |                 |
| URT (Log10) <sup>#</sup>       | NT           | 2.40 ± 2.14    | 0               |
| LRT (Log10) <sup>#</sup>       | NT           | 4.35 ± 1.62    | 1.04 ± 1.94     |
| TWC (x10 <sup>9</sup> cells/L) | NT           | 11.75 ± 6.55   | 12.33 ± 8.16    |
| CRP (mg/L)                     | NT           | 86.00 ± 44.12  | 70.69 ± 56.81   |
| Procalcitonin (ng/ml)          | NT           | 1.87 ± 3.68    | 5.49 ± 14.52    |
| PF <sup>#</sup>                | NT           | 146.79 ± 89.23 | 228.49 ± 168.07 |

436 <sup>\*</sup>: Male of total group size (%); Value: mean ± SD; NT: Not Tested; URT: Viral Load on Upper

437 Respiratory Tract; LRT: Viral Load on Lower Respiratory Tract; TWC: Total White Cells; CRP:C-

438 Reactive Protein; PF: PO<sub>2</sub>/FiO<sub>2</sub> ratio

439 <sup>†</sup>: Significantly difference between case and control group with *p* value less than 0.05

440 <sup>#</sup>: Significantly difference between earlier and later time point in case with *p* value less than 0.05

441 [Go Back To Content](#)

442

443 Table 2: Sensitivity of proteins to clinical characters

| Clinical Characters | Protein | Pearson Correlation r | p-value    | Protein Name |
|---------------------|---------|-----------------------|------------|--------------|
| TWC                 | Q13790  | -0.54409              | 0.00028447 | APOF         |
|                     | P02647  | -0.53654              | 0.00035842 | APOA1        |
|                     | P02747  | -0.52646              | 0.00048385 | C1QC         |
|                     | P04264  | 0.50149               | 0.00097879 | KRT1         |
| SPO2                | P04003  | -0.52895              | 0.00044974 | C4BPA        |
|                     | P00488  | -0.50761              | 0.00082778 | F13A1        |
|                     | P01023  | -0.55056              | 0.00023238 | A2M          |
|                     | Q8NBP7  | -0.50561              | 0.00087468 | PCSK9        |
|                     | P55058  | -0.52354              | 0.0005269  | PLTP         |
|                     | Q13790  | -0.5638               | 0.00015156 | APOF         |
|                     | P02647  | -0.58072              | 8.54E-05   | APOA1        |
|                     | P02747  | -0.59343              | 5.44E-05   | C1QC         |
|                     | P04004  | 0.52126               | 0.00056294 | VTN          |
|                     | P02743  | 0.52281               | 0.00053827 | APCS         |
| PF                  | P02788  | 0.50454               | 0.00090069 | LTF          |
|                     | P06732  | 0.5008                | 0.00099743 | CKM          |
|                     | P11226  | 0.50253               | 0.00095164 | MBL2         |
|                     | P00915  | 0.50188               | 0.00096852 | CA1          |
|                     | P33151  | 0.50298               | 0.00093986 | CDH5         |
|                     | P02649  | 0.52422               | 0.00051661 | APOE         |
|                     | P10909  | 0.54334               | 0.00029115 | CLU          |
|                     | P19823  | 0.52297               | 0.00053578 | ITIH2        |

P00747

0.51514

0.00067033

PLG

444

445

[Go Back To Content](#)
